# Supplementary material
Source: PubMed Central journal article supplement (PMC2835031)
Supplement: mt2009192x1.pdf [file mt2009192x1.pdf]

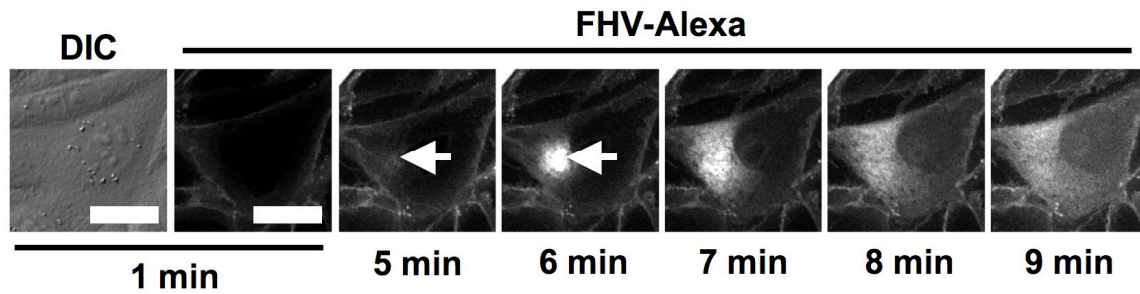

**Figure S1.** Time course study of FHV-Alexa internalization into CHO-K1 cells. The cells were treated with the peptide (10  $\mu\text{M}$ ) in the presence of 10% serum at 37  $^{\circ}\text{C}$ , and visualized in the continued presence of the peptide. Arrow indicates the initiation points of the cytosolic diffusion of the peptide. Scale bar, 20  $\mu\text{m}$ .
