# Supplementary material
Source: PubMed Central journal article supplement (PMC2835031)
Supplement: mt2009192x2.pdf [file mt2009192x2.pdf]

**Figure S2.** Effects of serum and peptide concentration on internalization of the Tat peptide into cells. Confocal microscopic observation of CHO-K1 cells treated with Tat-Alexa (20 or 50  $\mu\text{M}$ ) for 10 min at 37 °C in the presence or absence of 10% heat-inactivated fetal bovine serum. Scale bar, 10  $\mu\text{m}$ .
