# Supplementary material
Source: PubMed Central journal article supplement (PMC2835031)
Supplement: mt2009192x3.pdf [file mt2009192x3.pdf]

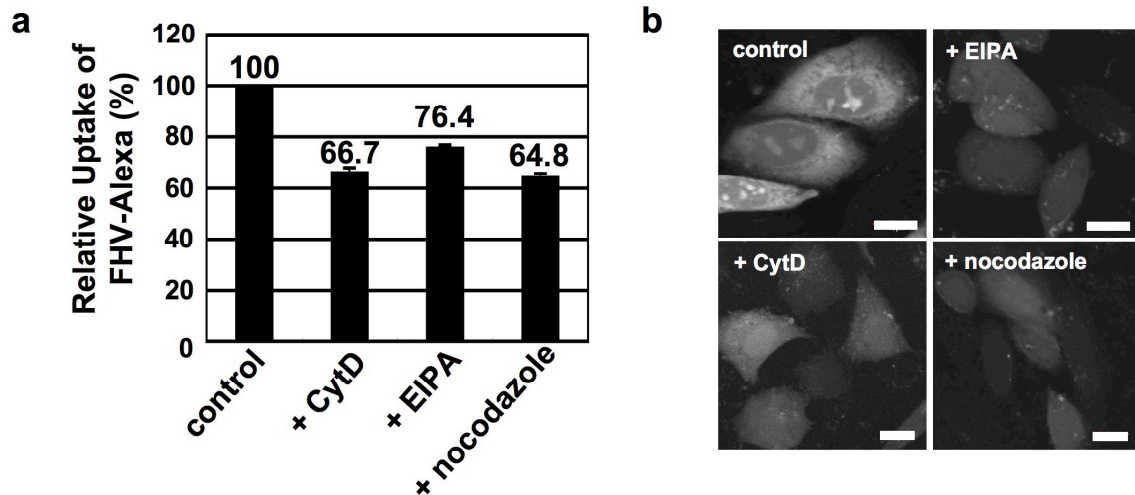

**Figure S3.** Effects of macropinocytosis inhibitor on penetration of the FHV peptide into cells. (a) Cellular uptake of FHV-Alexa (10  $\mu$ M) in 10 min by CHO-K1 cells pre-treated with CytD, EIPA, nocodazole, analyzed by FACS. Data represent the average ( $\pm$  S.D.) of three experiments. Cells treated with FHV-Alexa in the absence of macropinocytosis inhibitors were taken as control. The amount of the FHV-Alexa taken up by the cells treated with each macropinocytosis inhibitor was normalized to the result of control as a standard. (b) Confocal microscopic observation of CHO-K1 cells treated with FHV-Alexa (10  $\mu$ M) and macropinocytosis inhibitors under the same experimental conditions as (a). Scale bar, 10  $\mu$ m.
