# Supplementary material
Source: PubMed Central journal article supplement (PMC2835031)
Supplement: mt2009192x4.pdf [file mt2009192x4.pdf]

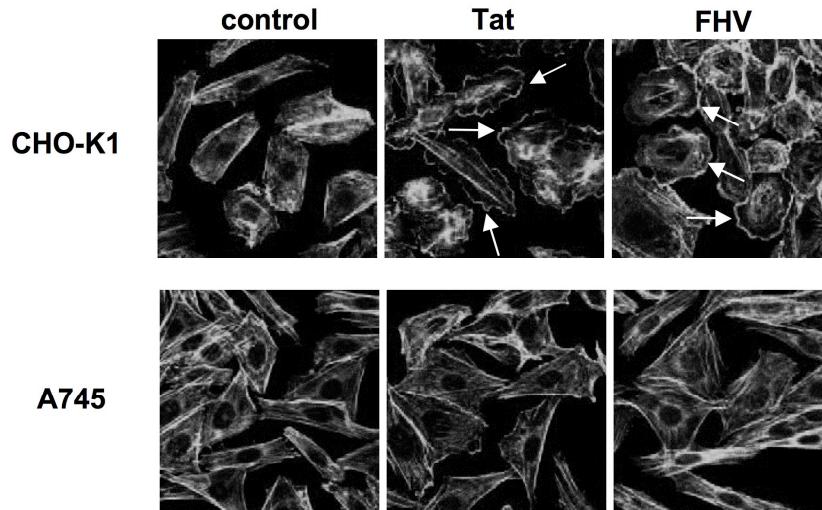

**Figure S4.** Actin organization in CHO-K1 cells and its absence in A745 cells following incubation with FHV and Tat peptides. Cells were treated with 10  $\mu$ M peptide for 2.5 min at 37  $^{\circ}$ C, and actin cytoskeletons were then stained with phalloidin-TRITC after fixation of the cells using 4% paraformaldehyde. Arrows show lamellipodia formations. Cells treated in the absence of peptides were taken as controls.
